# Supplementary material for: Evaluating the development of chemistry undergraduate researchers’ scientific thinking skills using performance-data: first findings from the performance assessment of undergraduate research (PURE) instrument
Source: Royal Society of Chemistry journal article supplement (doi:10.1039/c6rp00222f), 2017-01-01
Supplement: c6rp00222f1.pdf [file c6rp00222f1.pdf]

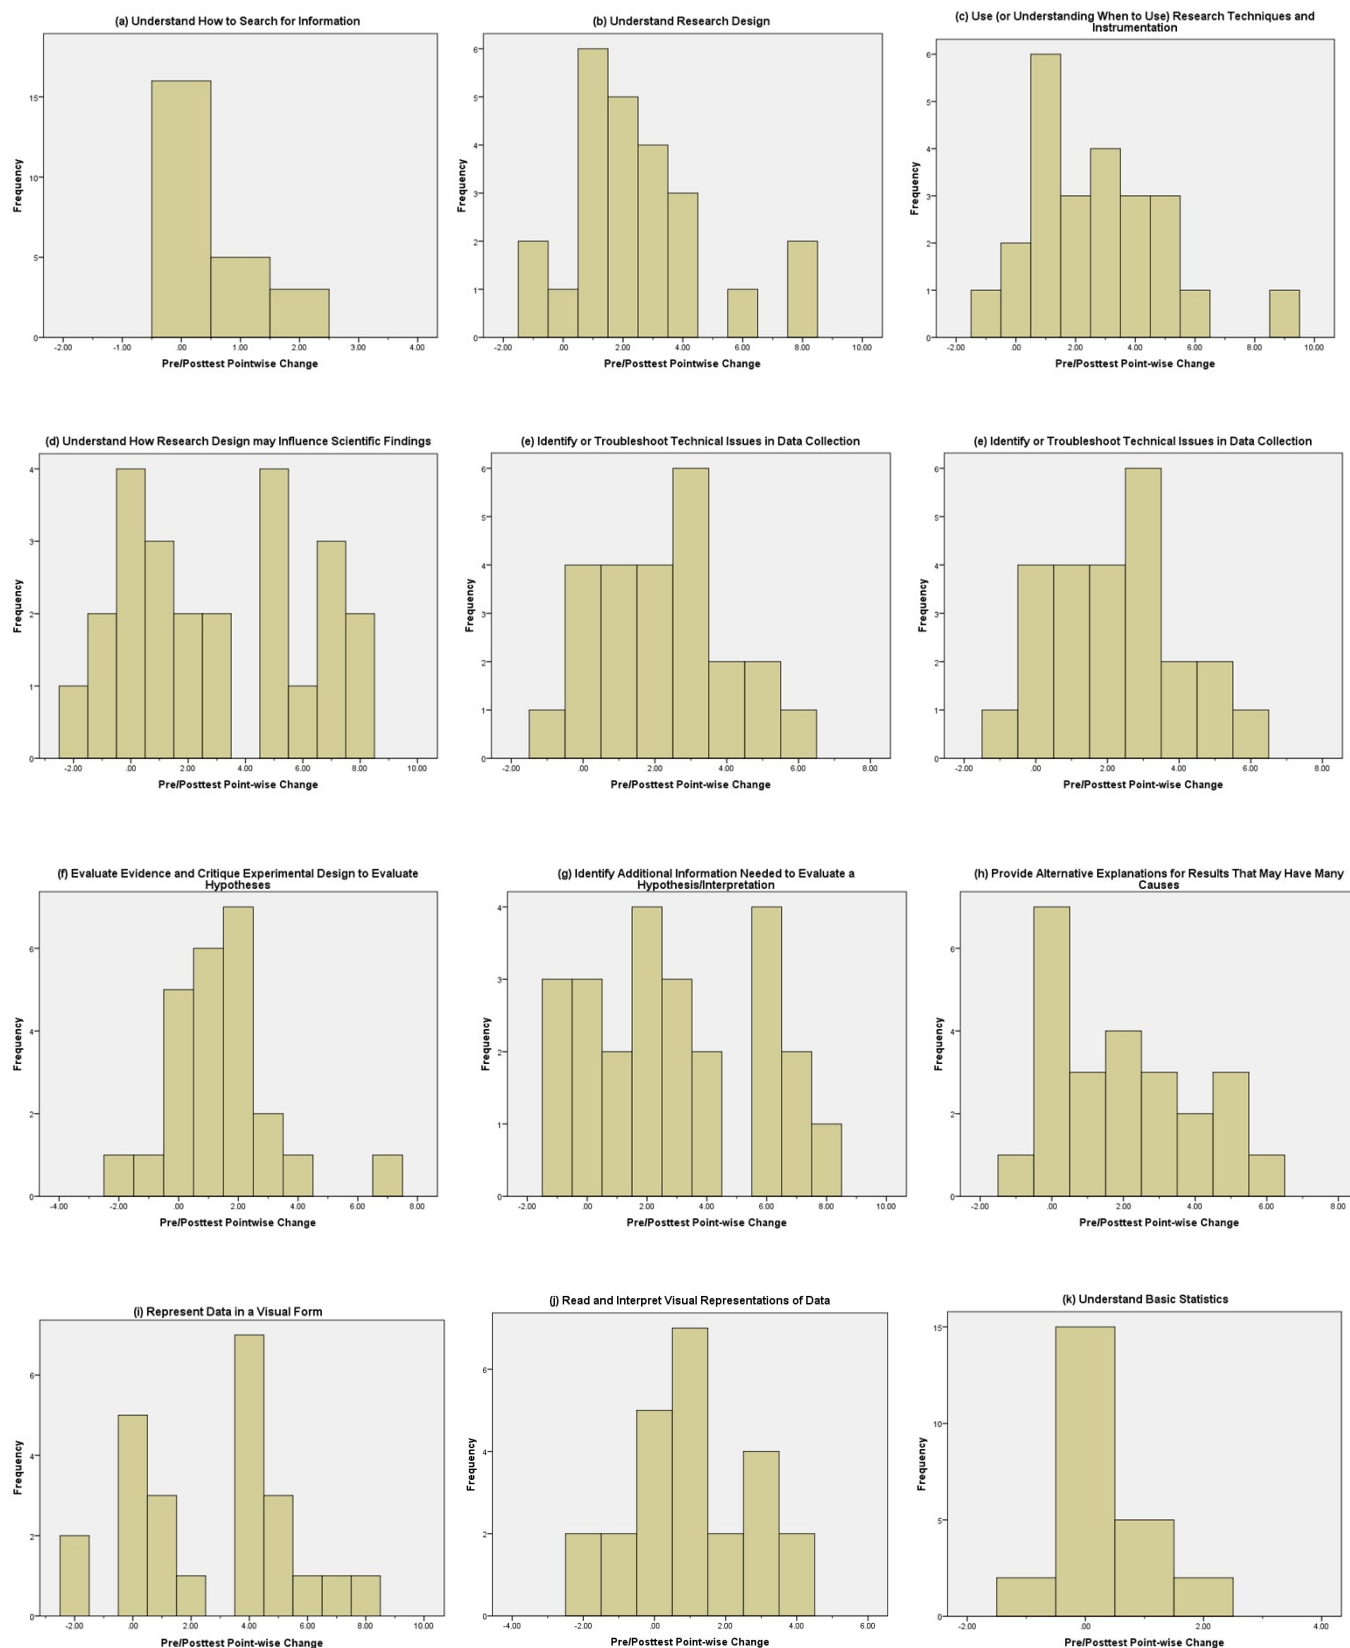

Figure S1. Distribution of students' point-wise change in the target skill areas as a function of time.

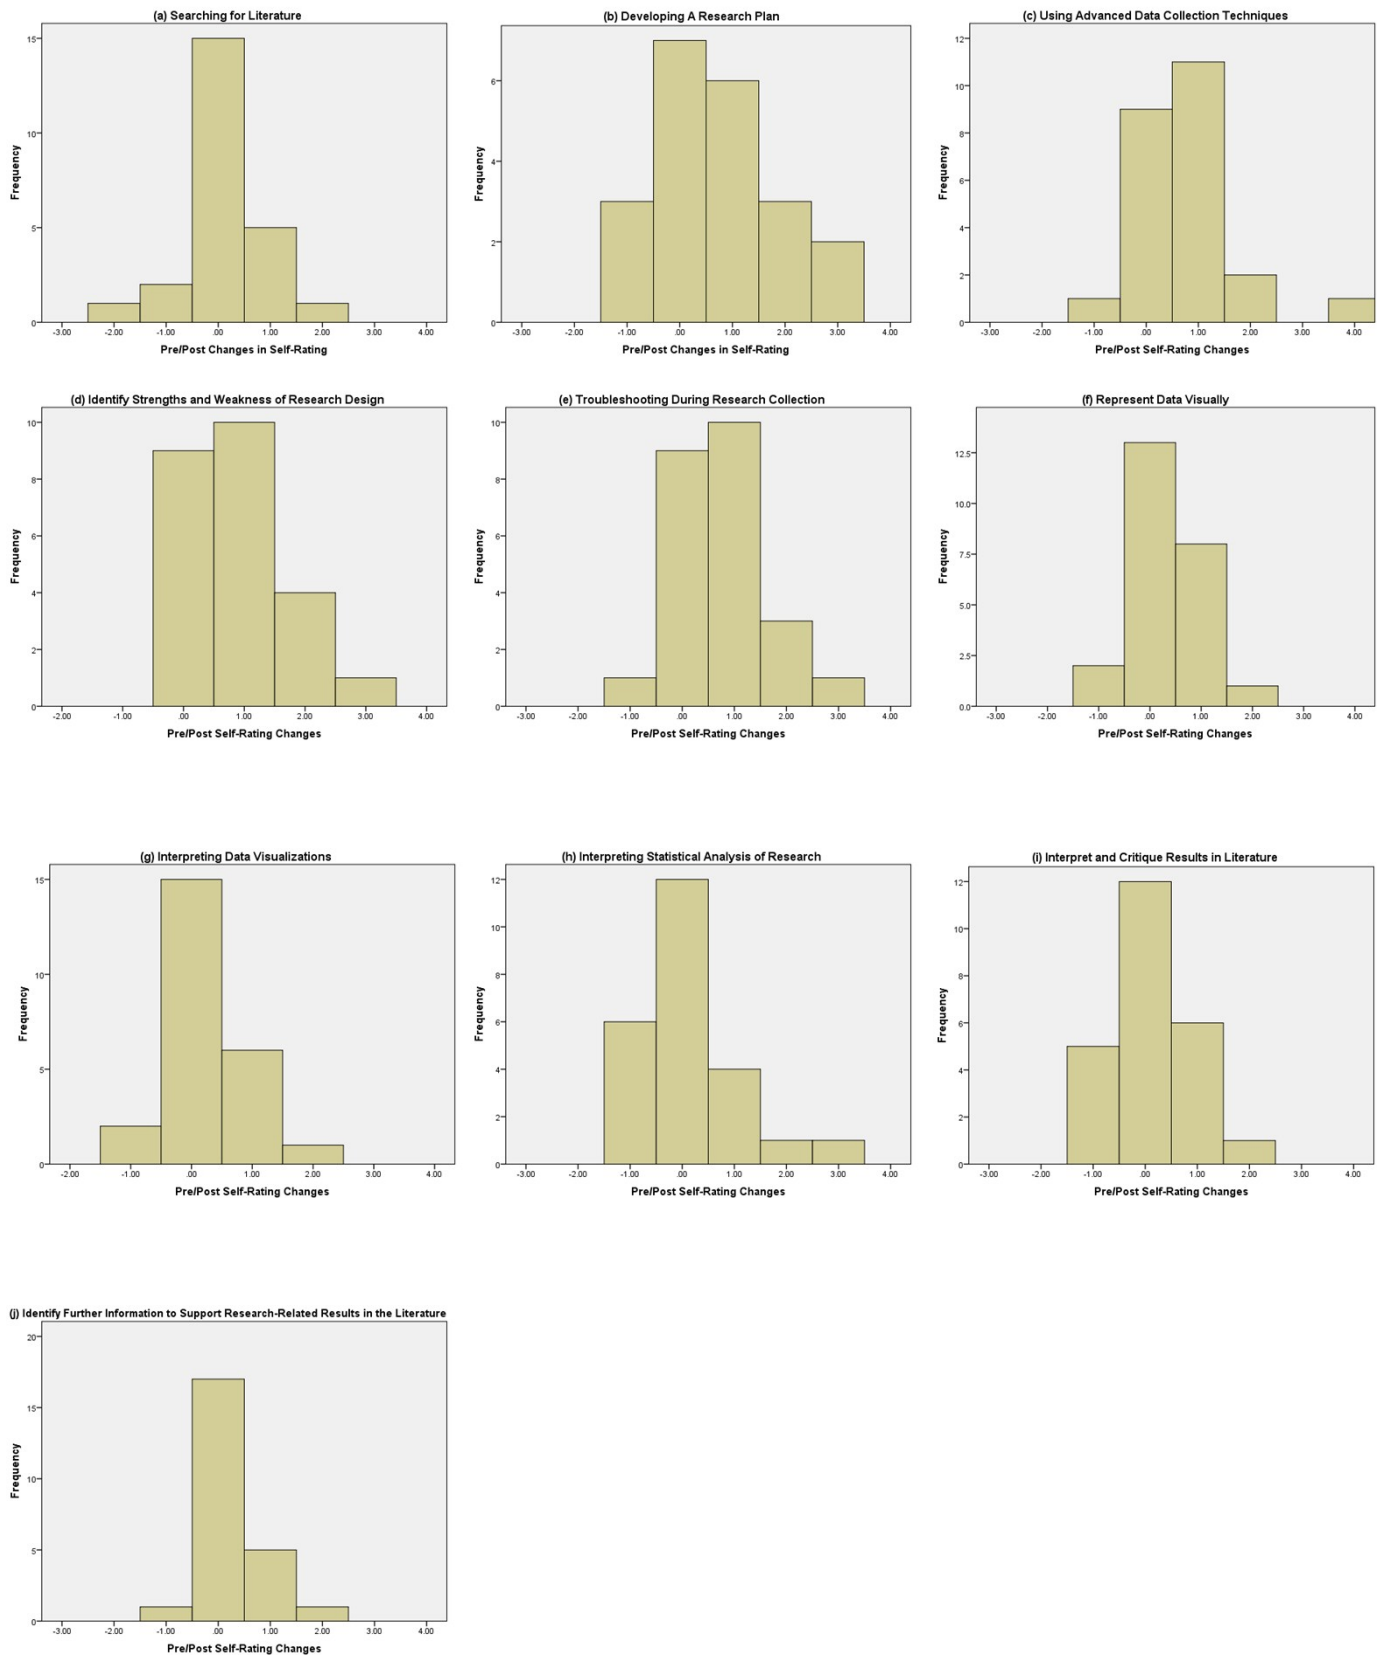

Figure S3. Self-reported changes in students' scientific thinking skills at the beginning and end of the URE.
